1                    **«*In vitro* and *in vivo* efficacy of the combination of colistin and endolysins**  
2                    **against clinical strains of Multi-Drug Resistant (MDR) pathogens»**

3  
4 L. Blasco<sup>1</sup>€, A. Ambroa<sup>1</sup>€, R. Trastoy<sup>1</sup>, E. Perez-Nadales<sup>2</sup>, F. Fernández-Cuenca, J<sup>3</sup>. Torre-Cisneros<sup>2</sup>,  
5 J. Oteo<sup>4</sup>, A. Oliver<sup>5</sup>, R. Canton<sup>6</sup>, T. Kidd<sup>7</sup>, F. Navarro<sup>8</sup>, E. Miró<sup>8</sup>, A. Pascual<sup>3</sup>, G. Bou<sup>1</sup>,  
6 L. Martínez-Martínez<sup>2</sup>°, M. Tomas<sup>1</sup>°\*; GEMARA SEIMC/REIPI Bacterial Clinical Adaptation  
7 Study Group

8  
9  
10  
11 <sup>1</sup>Microbiology Department-Research Institute Biomedical A Coruña (INIBIC), Hospital A Coruña  
12 (CHUAC), University of A Coruña (UDC), A Coruña, Spain.

13 <sup>2</sup>Unit of Microbiology, University Hospital Reina Sofía, Department of Microbiology, University of  
14 Córdoba, Maimonides Biomedical Research Institute of Cordoba (IMIBIC), Cordoba, Spain.

15 <sup>3</sup>Clinical Unit for Infectious Diseases, Microbiology and Preventive Medicine, Hospital  
16 Universitario Virgen Macarena / Department of Microbiology and Medicine, University of Seville/  
17 Biomedicine Institute of Seville (IBIS), Seville, Spain.

18 <sup>4</sup>Reference and Research Laboratory for Antibiotic Resistance and Health Care Infections, National  
19 Centre for Microbiology, Institute of Health Carlos III, Majadahonda, Madrid, Spain.

20 <sup>5</sup>Microbiology Department-Research Institute Biomedical Islas Baleares (IdISBa), Hospital Son  
21 Espases, Palma de Mallorca, Spain.

22 <sup>6</sup>Microbiology Department-Research Institute Biomedical Ramón and Cajal (IRYCIS), Hospital  
23 Ramón and Cajal, Madrid, Spain.

24 <sup>7</sup>School of Chemistry and Molecular Biosciences and Child Health Research Centre, The University  
25 of Queensland, Brisbane, QLD, Australia.

26 <sup>8</sup> Microbiology Department-Sant Pau hospital, Barcelona, Spain.

27 €°,° These authors equally contributed to this work.

28 \*To whom correspondence should be addressed: María Tomás.

29 Phone: +34 981176399; Fax: +34 981178273.

30 Emails: [MA.del.Mar.Tomas.Carmona@sergas.es](mailto:MA.del.Mar.Tomas.Carmona@sergas.es)

31  
32  
33  
34 **Running title:** «Combination active of colistin and endolysins»

35 **Keywords:** Endolysin, Colistin, Gram-negative, *Acinetobacter*, *Pseudomonas*, *Klebsiella*.

36

37 **ABSTRACT**

38 The multidrug resistance (MDR) among pathogenic bacteria is jeopardizing the worth of  
39 antimicrobials, which had previously changed medical sciences. In this study, we used  
40 bioinformatic tools to identify the endolysins ElyA1 and ElyA2 (GH108-PG3 family) present in the  
41 genome of bacteriophages Ab1051Φ and Ab1052Φ, respectively. The muralytic activity of these  
42 endolysins over MDR clinical isolates (*Acinetobacter baumannii*, *Pseudomonas aeruginosa* and  
43 *Klebsiella pneumoniae*) was tested using the turbidity reduction assay. The minimal inhibitory  
44 concentrations (MICs) of endolysin, colistin and their combination were determined using the  
45 microdilution checkerboard method. The antimicrobial activity of the combinations was confirmed  
46 by time kill curves and *in vivo* assays in larvae of *Galleria mellonella*. Our results showed that  
47 ElyA1 displayed activity against all 25 strains of *A. baumannii* and *P. aeruginosa* tested and against  
48 13 out of 17 strains of *K. pneumoniae*. No activity was detected when assays were done with  
49 endolysin ElyA2. The combined antimicrobial activity of colistin and endolysin ElyA1 yielded a  
50 reduction in the colistin MIC for all strains studied, except *K. pneumoniae*. These results were  
51 confirmed *in vivo* in *G. mellonella* survival assays. In conclusion, the combination of colistin with  
52 new endolysins such as ElyA1 could increase the bactericidal activity and reduce the MIC of the  
53 antibiotic, thus also reducing the associated toxicity.

54 **IMPORTANCE**

55 The development of multiresistance by pathogen bacteria increases the necessity of the  
56 development of new antimicrobial strategies. In this work, we combined the effect of the colistin  
57 with a new endolysin, ElyA1, from a bacteriophage present in the clinical strain of *Acinetobacter*  
58 *baumannii* Ab105. ElyA1 is a lysozyme-like family (GH108-GP3), whose antimicrobial activity  
59 was described for first time in this work. Also, another endolysin, ElyA2, with the same origin and  
60 family, was characterized but in this case no activity was detected. ElyA1 presented lytic activity  
61 over a broad spectrum of strains from *A. baumannii*, *Pseudomonas aeruginosa*, and *Klebsiella*  
62 *pneumoniae*. When colistin was combined with ElyA1 an increase of the antimicrobial activity was

63 observed with a reduced concentration of colistin, and this observation was also confirmed *in vivo*  
64 in *Galleria mellonella* larvae. The combination of colistin with new endolysins as ElyA1 could  
65 increase the bactericidal activity and lowering the MIC of the antibiotic, thus also reducing the  
66 associated toxicity.

67

68

69

70

71

72

73

74

75

76

77

78

79

80

81

82

83

84

85

86

87

88

## 89 INTRODUCTION

90 The worldwide emergence of multidrug resistant (MDR) microorganisms that are refractory to  
91 treatment with current therapeutic agents has emphasised the urgent need for new classes of  
92 antimicrobial agents (1). Recently, the World Health Organization (WHO) published a list of  
93 “priority pathogens” which includes those microorganisms that are considered a serious threat to  
94 human health and for which new anti-infective treatments are urgently needed. The members of this  
95 list are carbapenem-resistant *A.baumannii*, *P.aeruginosa* and *K.pneumoniae* clinical isolates (2).

96 A consequence of the emergence of the MDR bacteria is the return to the use of antimicrobials  
97 whose use was reduced or abandoned. This was the case of colistin or polymixin E, a cationic  
98 peptide which disturbs the stability of the outer membrane increasing its permeability through  
99 electrostatic interactions and cationic displacement of the lipopolysaccharide. In spite of its  
100 antimicrobial effects, this antibiotic presented nephrotoxicity effects and finally its use was  
101 gradually dismissed and substituted by other more tolerable antibiotics (3, 4). The search of new  
102 antimicrobial agents as well as their combination with old antibiotics such as colistin are new  
103 strategies in seeking novel treatments against MDR microorganisms.

104 In recent years, a novel drug discovery approach has explored endolysin enzymes (also referred to  
105 as enzybiotics) encoded by bacteriophages (viruses which infect bacteria) (5). Endolysins are  
106 actively produced during the lytic cycle and exert antibacterial activity through degradation of  
107 peptidoglycan in the bacterial cell wall (5, 6).

108 Endolysins are highly evolved enzymes produced by bacteriophages to digest the bacterial cell wall  
109 at the end of their replication cycle and release the phage progeny. Endolysins target the integrity of  
110 the cell wall and attack one of the major bonds in the peptidoglycan layer. They can be classified  
111 into five groups according to the cleavage site: N-acetyl- $\beta$ -D-muramidase (lysozymes); N-acetyl- $\beta$ -  
112 D-glucosaminidases (glycosidases); lytic transglycosylase; N-acetylmuramoyl-L-alanine amidases  
113 and L-alanoyl-D-glutamate endopeptidases (6, 7).

114 Endolysins are good candidates as new antimicrobial agents against Gram-positive bacteria, in



115 which the peptidoglycan layer of the cell wall is exposed to the medium. Several studies have  
116 evaluated the potential use of endolysin against Gram-positive bacteria such as *Staphylococcus*  
117 *aureus*, *Streptococcus agalactiae*, *Streptococcus pneumoniae* and *Streptococcus pyogenes* in animal  
118 models of human infections and diseases (8-16). In Gram-negative bacteria, the outer membrane  
119 acts as a barrier to many endolysins, and very few endolysins with exogenous activity against  
120 Gram-negative bacteria have been described (many are biotechnologically engineered) (17-20).  
121 Endolysins can attack Gram-negative bacteria when the outer membrane is previously  
122 permeabilized with agents such as EDTA, which destabilizes the lipopolysaccharides of the outer  
123 membrane; however, the combination of endolysin and EDTA is limited to a topical treatment of  
124 localized infections (21, 22). In the search for alternative methods of killing MDR bacteria such as  
125 *A. baumannii*, *P.aeruginosa* and *K.pneumoniae* various researchers have considered increasing the  
126 muralytic activity of endolysins by combining them with different antibiotics to take advantage of  
127 synergistic responses (22-25).

128 In this report, we identified and characterized an endolysin, named ElyA1, isolated from the  
129 *A. baumannii* Ab105 (ROC0034a) bacteriophage Ab1051Φ. The endolysin displayed muralytic  
130 activity against a broad spectrum of MDR organisms. In addition, combining endolysin ElyA1 with  
131 colistin (polymyxin E) enhanced the susceptibility of the tested strains to colistin by at least four  
132 times, thus highlighting the potential of endolysin ElyA1 as an antibacterial agent candidate. This  
133 effect was confirmed by a test *in vivo*, in which the survival of the *G. mellonella* larvae increased  
134 when colistin (¼ MIC) was supplemented with endolysin ElyA1. Moreover, another endolysin from  
135 the same family, named ElyA2, was identified in the *A. baumannii* Ab105 bacteriophage Ab1052Φ,  
136 but no muralytic activity was detected in this enzyme.

## 137 MATERIALS AND METHODS

### 138 Strains and culture conditions

139 The bacterial strains and plasmids used in this study included 25 *A. baumannii* MDR strains  
140 belonging to 22 different sequence types (STs) (Table 1). The strains were isolated from colonized

141 or infected patients within the framework of the II Spanish Multicentre Study which counted with  
142 the participation of 45 Spanish hospitals (GEIH-REIPI *Acinetobacter baumannii* 2000-2010,  
143 Genbank Umbrella Bioproject accession number PRJNA422585)(26). They included 25 MDR  
144 clinical strains of *P. aeruginosa* (many included in CC274), all of which were isolated from cystic  
145 fibrosis patients, and 17 carbapenemase-producing strains of *K. pneumoniae*, which were isolated in  
146 20 Spanish hospitals during the EuSCAPE project (27, 28). Moreover, *Escherichia coli* DH5 $\alpha$  and  
147 Rosetta strains were used in cloning assays (Table 1).

148 All strains were cultured in LB (Luria Bertani) at 180 rpm and 37°C. For solid medium, 2% of agar  
149 was added to LB broth. When transformation assays were done the medium was supplemented with  
150 50 $\mu$ g/ml of ampicillin.

#### 151 **Identification and Purification of the endolysins ElyA1 and ElyA2**

152 Endolysin gene prediction, from the genome of the bacteriophage Ab105 $\Phi$ 1 (GenBank:  
153 KT588074.1) and Ab105 $\Phi$ 2 (GenBank: KT588075.2) (26) (Figure 1), was performed with the  
154 bioinformatic tools PHASTER (Phage Search Tool Enhanced Release) and RAST (Rapid  
155 Annotation Using Subsystem). Protein homology analysis was performed by BLAST (Basic Local  
156 Alignment Search Tool), Clustal Omega and MView. Protein families were assigned using  
157 InterProScan and the domain graphic was assigned with PROSITE MyDomains.

158 The endolysin genes were amplified by PCR from the genomic DNA of *A. baumannii* Ab105,  
159 which contains the DNA of the prophages Ab105 $\Phi$ 1 and Ab105 $\Phi$ 2, and cloned into the expression  
160 vector pET-28a (Novagen). The recombinant plasmids were transformed into competent *E. coli*  
161 DH5 $\alpha$  cells (Novagen) for DNA production and purification, and the integrity of both constructs  
162 was verified by sequencing. All of the primers used are listed in Table 1. Finally, the plasmids were  
163 transformed into *Escherichia coli* Rosetta pLys-S cells (Novagen) for expression of the protein.

164 After induction with 1 mM IPTG, the culture (1 l) was grown at 30°C for 5 h. The bacterial cells  
165 were recovered by centrifugation (in a JLA 81000 rotor, Beckman-Coulter, at 6 Krpm for 15 min)  
166 and disrupted by sonication (VibraCell 75042 sonicator, Bioblock Scientific, tip model CV33). The

167 sample was centrifuged in a JA 25-50 rotor (Beckman-Coulter) at 20 Krpm for 30 min. The  
168 recovered supernatant was filtered using 0.45  $\mu\text{m}$  syringe-driven filters (Jet Biofil) and loaded in a  
169 His-Trap column (GE Healthcare) equilibrated with 350 mM NaCl, 50 mM Tris pH 7.5, 1 mM  
170 TCEP and 10 mM Imidazole. The proteins were eluted with 350 mM NaCl, 50 mM Tris pH 7.5, 1  
171 mM TCEP and 150 mM Imidazole. After concentration in an Amicon Ultracel 10,000 MCWO  
172 concentrator (Millipore), the sample was loaded into a Superdex 75 16/60 column (GE Healthcare),  
173 equilibrated with 150 mM NaCl, 20 mM Tris pH 7.5 and 1 mM TCEP. The protein was eluted in a  
174 single peak. Finally, the pooled peak fractions were concentrated to 40 mg/ml, as previously  
175 described. The purification process was carried out at 4° C, and the purity was determined by SDS-  
176 PAGE (Figure 1).

#### 177 **Determination of the muralytic activity of endolysins ElyA1 and ElyA2**

178 Muralytic activity was determined using the Gram-negative overlay method described by Schmitz  
179 et al (29). Briefly, two clinical isolates of *A. baumannii*, MAR001 and PAU002, were grown to  
180 stationary phase ( $10^9$  CFU/ml) in LB, pelleted and resuspended in PBS buffer pH 7.4. Agar was  
181 added directly to the bacteria suspension suspension at a concentration of 0.8% and autoclaved for  
182 15min at 120°C. The medium, containing the disorganized cells with the peptidoglycan exposed,  
183 was solidified in Petri dishes and aliquots (50  $\mu\text{g}$ ) of endolysin, or the endolysin buffer as negative  
184 control were spotted on the surface.

185 The muralytic activity was measured using as target a culture of *A. baumannii* Ab105 treated with  
186 EDTA in order to permeabilize the outer membrane. An overnight culture of *A. baumannii* Ab105  
187 was diluted 1:100 in LB medium and grown to exponential phase (0.3-0.4 OD<sub>600nm</sub>). The culture  
188 was centrifuged (3000g, 10min), and the resulting pellet was resuspended in 20mM Tris-HCl buffer  
189 at pH 8.5 with 0.5 mM EDTA before being incubated for 30 min at room temperature. The pellet  
190 was recovered by centrifugation and washed twice in Tris-HCl buffer pH 8.5. Finally, the cells were  
191 resuspended in 20 mM Tris-HCl 150 mM NaCl pH8.5 and 25  $\mu\text{g}/\text{ml}$  of endolysin ElyA1. The  
192 activity was measured by the turbidity reduction assay, as a decrease in the OD<sub>600nm</sub> after

193 incubation with after with shaking at 37°C (17). The optical density was measured at intervals of 5  
194 minutes for a period of 20 minutes and the time point of the higher activity was established. Also,  
195 the optimal pH and temperature for the endolysin activity were determined employing the turbidity  
196 reduction assay. The reaction was done as described previously, with the Tris-HCl at different pH  
197 (range 6.5 to 9) and temperature (room temperature, 30°C and 37°C).

## 198 **Antibacterial assays**

199 The antibacterial activity of the endolysin was assayed with all of the 67 clinical strains of *A.*  
200 *baumannii*, *P. aeruginosa* and *K. pneumoniae* (Table 1). The activity was determined using the  
201 turbidity reduction assay, as previously described, at pH 8.5 and 37°C. The incubation times in the  
202 presence of EDTA varied according to the species assayed: 30 min for *A. baumannii* and *K.*  
203 *pneumoniae* and 15 min for *P. pneumoniae*.

## 204 **Broth microdilution checkerboard assay and microdilution test to determine minimum** 205 **inhibitory concentrations (MICs)**

206 This assay was done in those strains with the higher and the lower susceptibility to endolysin. All  
207 the strains tested were susceptible to colistin except three strains that were colistin resistant: *A.*  
208 *baumannii* SOF004b, *P. aeruginosa* AUS034 and *K. pneumoniae* KP2. The effect of the interaction  
209 between endolysin and colistin was done by the chequerboard MIC assay. In a 96-well microtiter  
210 plate with Mueller-Hinton Broth (MHB), 7 serially double dilutions were done for endolysin and 6  
211 for colistin. The wells were then inoculated with the test culture at a final concentration of  $10^5$   
212 colony forming units (cfu/ml). The MIC of colistin (0 to 2  $\mu\text{gml}^{-1}$ ) and concentration of endolysin  
213 ElyA1 protein (3.125 to 200  $\mu\text{gml}^{-1}$ ) was assayed independently in the same plate. The MIC was  
214 determined as the concentration of antimicrobial agent in the well where no visible growth of  
215 bacteria was observed after incubation for 24h at 35°C. The MIC<sub>AB</sub> was defined as the MIC of drug  
216 A in the presence of drug B, and the MIC<sub>BA</sub> was defined as the MIC of drug B in the presence of  
217 drug A.

218

## 219 **Time kill curve assay**

220 Time kill curve assays were carried out with those strains in which the MIC of colistin in ElyA1-  
221 colistin combinations was decreased by at least fourfold in checkerboard assays. The assay was  
222 conducted according to previously described techniques (30). Flasks of LB containing colistin and  
223 colistin plus endolysin at the concentration corresponding to the checkerboard assay were  
224 inoculated with a dilution 1:100 of an overnight culture in stationary phase of the tested strain and  
225 incubated at 37°C and 180 rpm in a shaking incubator. Aliquots were removed after 0, 6 and 24 h  
226 and were serially diluted and plated to produce colony forming units (cfu). Synergy was established  
227 when a  $\leq 2$   $-\log_{10}$  decrease in cells counts at 6 or 24 h in the antimicrobial combination relative to the  
228 most active single agent was observed. No effect was considered to have occurred when the counts  
229 were  $< 2$   $-\log_{10}$  lower or higher relative to the culture with the single agent. Antagonism was defined  
230 when the counts in the culture with antimicrobial combination were  $\geq 2$   $-\log_{10}$  higher than in the  
231 culture with single most active antimicrobial agent.

232 The reduction in the MIC of the colistin in combination with endolysins was also assayed by  
233 combining colistin with another endolysin ElyA2, isolated from the bacteriophage Ab105Φ2. The  
234 curve was done for the same strains and under the same conditions as for colistin-ElyA1.

## 235 ***Galleria mellonella* Infection Model**

236 The *Galleria mellonella* model was an adapted version of that developed by Peleg et al (31, 32).  
237 The procedure was as follows: twelve *G. mellonella* larvae, acquired from TruLarvTM (Biosystems  
238 Technology, Exeter, Devon, UK), were each injected with 10  $\mu$ l of a suspension of *A. baumannii*  
239 PON001, diluted in sterile phosphate buffer saline (PBS) containing  $1 \times 10^5$  CFU ( $\pm 0.5$  log). The  
240 injection was performed with a Hamilton syringe (volume 100  $\mu$ l) (Hamilton, Shanghai, China). An  
241 hour after infection, larvae were injected with 10  $\mu$ l of colistin in combination with endolysin  
242 ElyA1, colistin in combination with endolysin ElyA2, and colistin alone as a control group, all at  
243 the concentrations used in the time kill curve. After being injected, the larvae were placed in Petri  
244 dishes and incubated in darkness at 37°C. The number of dead larvae was recorded for 5 days. The

245 larvae were considered dead when they showed no movement in response to touch (31).  
246 The mortality curves corresponding to the *in vivo* *Galleria mellonella* infection model were  
247 constructed using GraphPad Prism v.6 and the data were analysed using the Graham-Breslow-  
248 Wilcoxon test. In both cases, p-values <0.05 were considered statistically significant, and the data  
249 were expressed as mean values.

## 250 **RESULTS**

### 251 **Identification of endolysins ElyA1 and ElyA2**

252 The gene of 546 bp coding for endolysin ElyA1 was identified as an ORF (Open Reading Frame)  
253 encoding a protein of 181 aa (GenBank: ALJ99090.1) and 20.22 kDa. The protein sequence was  
254 analysed with InterProScan and classified as a lysozyme (N-acetylmuramidase) with a C-terminal  
255 domain corresponding with the Glycosyde hydrolase 108 superfamily and also a Peptidoglycan  
256 Binding domain PG3 at the N-terminal end.

257 Protein homology analysis revealed a high level of homology (more than 80%) with a group of 9  
258 endolysins from *A. baumannii* bacteriophages belonging to the same protein family as ElyA1 (20).

259 Endolysin ElyA2 gene of 543 bp was identified as an ORF encoding a protein of 180 aa (GenBank:  
260 ALJ99174.1) and with a MW of 20.19 kDa. The sequence analysis revealed that ElyA2 protein is  
261 also a lysozyme (N-acetylmuramidase) with a C-terminal domain corresponding with the  
262 Glycosyde hydrolase 108 superfamily and also a Peptidoglycan Binding domain PG3 at the N-  
263 terminal end.

264 As ElyA1 protein, this enzyme presented a high homology (more than 80%) with the same group of  
265 9 endolysins and also a homology of 90% with ElyA1 protein (20).

### 266 **Endolysins muralytic activity characterization**

267 In the first screening of the muralytic activity of the purified endolysin ElyA1 in the Gram-negative  
268 overlay plates, a lysis halo appeared in both strains of *A. baumannii* tested (Figure 2a).

269 The muralytic activity of this enzyme was characterized using the Gram-negative bacteria *A.*  
270 *baumannii* Ab105 as substrate, as this is the host strain for the phage Ab105Φ1. The enzymatic

271 activity was measured after different incubation at different temperatures and pH. The maximum  
272 activity was obtained after incubation for 10 min at pH8.5 and 37°C (Figure 2b-c). In addition, the  
273 muralytic activity on the cells of Ab105 was assayed directly or after treatment of the cells with  
274 EDTA to permeabilize the outer membrane. However, no activity was detected when the enzyme  
275 was added directly to the cells whose outer membrane was not previously permeabilized with  
276 EDTA, and also in this case the cells tended to aggregate (data not shown).

277 The antibacterial assays showed a broad lytic spectrum of activity against the strains of the three  
278 species tested (Figure 3). As expected because of the origin of the *A. baumannii* endolysin, the  
279 highest activity observed was among the 25 *A. baumannii* strains tested. Although the activity was  
280 more variable in *P. aeruginosa*, muralytic activity was detected against all of the strains tested.  
281 Finally, endolysin ElyA1 displayed activity against 13 of the 17 *K. pneumoniae* strains, although at  
282 lower levels than in *A. baumannii* and *P. aeruginosa*. The strains tested in the three species  
283 belonged to different STs, but no correlation between the susceptibility to endolysin ElyA1 and the  
284 ST was detected.

285 When muralytic activity of endolysin ElyA2 was tested no activity was detected under any  
286 condition assayed. On the contrary, this enzyme induces the aggregation of the cells at all the  
287 enzyme concentration tested both in those cells treated previously with EDTA and in those with an  
288 intact outer membrane.

### 289 **Endolysin ElyA1 and colistin combination activity Assays**

290 As endolysin ElyA1 is only active when the outer membrane of the target bacterial cell is  
291 solubilized, the MIC of the endolysin was not able to be determined by the microdilution  
292 checkerboard test. We therefore aimed to detect any decrease in the colistin MICs when used in  
293 combination with endolysin ElyA1. The addition of endolysin ElyA1 yielded a fourfold reduction  
294 in the colistin MICs in four of the six strains tested (*A. baumannii* GMA001 and PON001, *P.*  
295 *aeruginosa* AUS531 and *K. pneumoniae* KP17) (Figure 4). By contrast, only a twofold reduction in  
296 the colistin MIC was observed with *P. aeruginosa* AUS601 and no decrease with *K. pneumoniae*



297 KP16. The latter was consistent with the lack of enzymatic activity observed in the antibacterial  
298 assays (Figure 4). Finally, no antimicrobial activity was detected when the combination was tested  
299 in the colistin resistant isolates (data not shown).

300 The results of the time kill curve assay confirmed the results obtained by the microdilution  
301 checkerboard test (Figure 4). A 2 log reduction was shown in the growth of both the *A. baumannii*  
302 strains and *P. aeruginosa* AUS531 after 6 hours in the culture with 1/4 of colistin and endolysin  
303 ElyA1, indicating a synergetic reaction between colistin and endolysin ElyA1. By contrast, no  
304 reduction was observed in the *K. pneumoniae* KP17 culture.

### 305 **Mortality in the *in vivo* *Galleria mellonella* Model**

306 Larvae of the wax moth were infected with the clinical strain of *A. baumannii* PON001. When  
307 infected larvae were treated with colistin (1/4MIC) in combination with endolysin ElyA1 (25 µg/ml),  
308 a significative increase ( $P<0.05$ ) in the survival was observed in the treated larvae respect to those  
309 treated only with colistin (1/4 MIC) (Figure 5a). When colistin (1/4 MIC) was combined with ElyA2  
310 (25 µg/ml) no significative differences ( $P>0.05$ ) were obtained when compared with the treatment  
311 with colistin, as no muralytic activity was previously detected with ElyA2 (Figure 5b).

### 312 **DISCUSSION**

313 The discovery and development of novel antimicrobial agents to treat infections caused by the  
314 “priority” group of pathogens has occurred in the medical and research community (2).

315 Enzybiotics have become a focus of attention of many research groups worldwide. Endolysins, one  
316 type of enzybiotic, are species or genus-specific enzymes that act by hydrolysing the peptidoglycan  
317 layer of the bacterial cell wall. There are no reports of bacteria developing resistance to endolysins,  
318 which is a great problem in both antibiotic therapy and also in phage therapy (16). Moreover,  
319 endolysins have been recognized by the United States of America in the National Action Plan for  
320 Combating Antibiotic-resistant Bacteria (33), which identified the use of “phage-derived lysins to  
321 kill specific bacteria while preserving the microbiota” as a key strategy to reduce the development  
322 of antimicrobial resistance (34) due to the absence of toxicity in human cells (35).



323 The outer membrane of Gram-negative bacteria acts as a barrier preventing access of many  
324 endolysins to their natural target, the peptidoglycan layer. This problem has been approached by  
325 different strategies, including solubilization of the outer membrane with EDTA, modification of the  
326 endolysin PGs by deletion or substitution and by the development of fusion proteins such as Art-175,  
327 made by fusing the endolysin with a peptide to enable the enzyme to pass through the outer  
328 membrane which has been a successful strategy (18, 36, 37). In *P.aeruginosa* strains, Briers et al.  
329 (18) worked in the development of Art-175 constituted by antimicrobial peptide (AMP) sheep  
330 myeloid 29-amino acid peptide (SMAP-29) fused with endolysin KZ144. Art-175 showed  
331 muralytic activity in *P.aeruginosa* isolate and continuous exposure to Art-175 did not elicit the  
332 development of resistance. On its own, SMAP-29 is cytotoxic to mammalian cells (38); however,  
333 Art-175 exhibited little toxicity in L-292 mouse connective tissue.

334 As a new strategy we combined the membrane destabilizing effect of the colistin (“last-line”  
335 treatment for these bacteria due to the concerns about its nephrotoxicity and neurotoxicity (39)),  
336 which is a cationic peptide used as an active outer membrane agent, and two endolysins identified  
337 by our research group that belong to a lysozyme-like family (GH108-PG3) never before used as  
338 antimicrobial treatment.

339 In this work we identified two endolysins, ElyA1 and ElyA2, obtained from *A. baumannii*  
340 bacteriophage Ab1051Φ and Ab105Φ2, available in a collection of clinical strains of *A. baumannii*  
341 isolated during the II Spanish Multicentre Study GEIH/REIPI-*A.baumannii* 2000-2010 (Accession  
342 number, Genbank Umbrella Bioproject PRJNA422585) (26, 40).

343 Endolysins ElyA1 and ElyA2 are lysozyme-like proteins with a catalytic domain and a cell wall  
344 binding domain (CBD), responsible for recognition of the cell surface ligands and affinity for the  
345 bacterial substrate (41, 42). This structure is most commonly found in endolysins from  
346 bacteriophages that target Gram-positive bacteria. However, the PG\_3 domain present in endolysins  
347 ElyA1 and ElyA2 has been identified in some Gram-negative bacteria and in a group of nine  
348 endolysins isolated from bacteriophages of *A. baumannii*; the domain shows high homology with

349 ElyA1 and belongs to the same family (Figure 1) (20, 40, 43). Our molecular features and  
350 comparative genomes results in bacteriophage endolysins were confirmed through the work of  
351 Oliveira et al (44).

352 Furthermore, the bacteriophages from which these endolysins were isolated, Ab1051Φ and  
353 Ab105Φ2, occur in a large number of clinical isolates of *A. baumannii* (26). The cell wall binding  
354 domain has been shown to be responsible for the specificity and affinity of the endolysins for its  
355 substrate (43). However, we observed that endolysin ElyA1 displays a broader spectrum of activity  
356 against strains of *A. baumannii* and also many strains of *P. aeruginosa* belonging to the same order,  
357 *Pseudomonadales*, and to lesser extent some strains of *K. pneumoniae* from another  
358 gammaproteobacterial order, *Enterobacteriales*. In this case, the target of endolysin ElyA1,  
359 identified in Peptidoglycan binding domains (PGs) as a D-Asn (43), is probably conserved among  
360 the *Pseudomonadales*, thus explaining the broad spectrum of action of this enzyme. Interestingly,  
361 we were not able to detect muralytic activity in endolysin ElyA2 because this enzyme induces the  
362 aggregation of the cells *in vitro*, probably preventing the activity of the enzyme over all the cells.

363 In the present study, we used the cationic polymyxin antibiotic colistin to overcome the  
364 impenetrability of the outer membrane to endolysin ElyA1. Colistin disturbs the outer membrane  
365 via an electrostatic interaction with lipopolysaccharides and phospholipids present in the outer  
366 membrane (4). The synergistic effect of endolysin LysABP-01 (Lysozyme-like protein from the  
367 GH19 family) and colistin on *A. baumannii* has previously been described (25). Although endolysin  
368 ElyA1 does not display exogenous activity, because of its inability to cross the outer membrane,  
369 this problem was largely overcome when the enzyme was used in combination with colistin, and the  
370 antimicrobial activity of the combined therapy was higher than for both substances used alone in all  
371 the tested strains except for those of *K. pneumoniae*. A reduction in the colistin MIC of at least  
372 fourfold occurred for all of the *A. baumannii* strains tested and for *P. aeruginosa* strain AUS531,  
373 and a corresponding twofold reduction was observed for *P. aeruginosa* strain AUS601. A reduction  
374 in the colistin MIC was also obtained for the *K. pneumoniae* strain KP17, the most susceptible to

375 endolysin ElyA1. The increased antimicrobial activity with endolysin ElyA1 and colistin was  
376 confirmed with the almost 3 log reduction in growth after 6 h in all strains tested, except KP17 *K.*  
377 *pneumoniae*. Growth of the culture reached the same level as in the control after 24 h, probably due  
378 to degradation of the enzyme and colistin, as also reported by Thummeepak *et al.* (22). In all of the  
379 strains tested the reduction in the colistin MIC was consistent with the muralytic activity of  
380 endolysin ElyA1 obtained for those strains. No antimicrobial activity was observed when this assay  
381 was conducted in colistin-resistant strains, probably because of the inability of the enzyme to access  
382 the peptidoglycan layer, as the necessary destabilization of the outer membrane by the colistin was  
383 not produced in these isolates. However, there are several resistance mechanisms to colistin  
384 described which include those in which the lipopolysaccharide is modified or is not produced  
385 preventing the joint of the colistin to the outer membrane, but there are other mechanisms in the  
386 literature which include efflux pumps described in *A. baumannii* and inhibition of respiratory  
387 enzymes as NADH oxidase in Gram positives as *Bacillus spp* and NADH quinone oxidoreductase  
388 in *E. coli*. It is probable that the activity of the enzyme would be higher in the bacteria with colistin  
389 resistance mechanisms different from that who modify the lipopolysaccharides (45-51). Future  
390 studies will be done over a range of different colistin resistant bacteria in order to reduce the MIC  
391 for colistin in combination with endolysin ElyA1.

392 The results obtained *in vitro* were confirmed with the assays done *in vivo*, as the survival of the  
393 infected larvae of *G. mellonella* was higher when the worms were treated with a combination of a  
394 reduced fourfold MIC of colistin and endolysin ElyA1 than with colistin alone. As a control the  
395 same assay was performed with endolysin ElyA2, in which the muralytic activity was not detected,  
396 and no differences were observed with the treatment with colistin.

397 In conclusion, this is the first study *in vitro* and *in vivo* (*G.mellonella*) where colistin is  
398 combined with endolysin ElyA1 (Glycosyde hydrolase 108 superfamily) against clinical MDR  
399 pathogens, which may enable the concentration of colistin used in antimicrobial treatments to be  
400 reduced, thus also reducing the toxic side effects of the antibiotic. The broad spectrum of action of

401 endolysin ElyA1 would enable more MDR Gram-negative bacteria to be included as targets for this  
402 combined antimicrobial treatment.

403

404

405

406

407

408

409

410

411

412

413

414

415

416

417

418

419

420

421

422

423

424

425

426

427 **ACKNOWLEDGEMENTS**

428 This study was funded by grant PI16/01163 awarded to M. Tomás within the State Plan for R+D+I  
429 2013-2016 (National Plan for Scientific Research, Technological Development and Innovation  
430 2008-2011) and co-financed by the ISCIII-Deputy General Directorate for Evaluation and  
431 Promotion of Research - European Regional Development Fund "A way of Making Europe" and  
432 Instituto de Salud Carlos III FEDER, Spanish Network for the Research in Infectious Diseases  
433 (REIPI, RD16/0016/0001, RD16/0016/0002, RD16/0016/0004, RD16/0016/0006,  
434 RD16/0016/0008, and RD16/0016/0011) and by the Study Group on Mechanisms of Action and  
435 Resistance to Antimicrobials, GEMARA (SEIMC, <http://www.seimc.org/>). M. Tomás was  
436 financially supported by the Miguel Servet Research Programme (SERGAS and ISCIII). R. Trastoy  
437 and L. Fernández-García were financially supported by respectively an SEIMC grant and  
438 predoctoral fellowship from the Xunta de Galicia (GAIN, Axencia de Innovación). TJK is  
439 supported by a National Health and Medical Research Council Early Career Fellowship  
440 (GNT1088448).

441 **TRANSPARENCY DECLARATIONS**

442 All authors declare no conflict of interest

443

444

445

446

447

448

449

450

451

452

453

454 **REFERENCES**

- 455 1. Bragg RR, Meyburgh CM, Lee JY, et al. Potential Treatment Options in a Post-antibiotic  
456 Era. *Adv Exp Med Biol*. 2018;1052:51-61.1.Bragg RR, Meyburgh CM, Lee JY, Coetzee M.  
457 2018. Potential Treatment Options in a Post-antibiotic Era. *Adv Exp Med Biol* 1052:51-61.
- 458 2. Tacconelli E, Carrara E, Savoldi A, Harbarth S, Mendelson M, Monnet DL, Pulcini C,  
459 Kahlmeter G, Kluytmans J, Carmeli Y, Ouellette M, Outtersson K, Patel J, Cavalieri M, Cox  
460 EM, Houchens CR, Grayson ML, Hansen P, Singh N, Theuretzbacher U, Magrini N, Group  
461 WPPLW. 2018. Discovery, research, and development of new antibiotics: the WHO priority  
462 list of antibiotic-resistant bacteria and tuberculosis. *Lancet Infect Dis* 18:318-327.
- 463 3. Gai Z, Samodelov SL, Kullak-Ublick GA, Visentin M. 2019. Molecular Mechanisms of  
464 Colistin-Induced Nephrotoxicity. *Molecules* 24.
- 465 4. Ordooei Javan A, Shokouhi S, Sahraei Z. 2015. A review on colistin nephrotoxicity. *Eur J*  
466 *Clin Pharmacol* 71:801-10.
- 467 5. Hojckova K, Stano M, Klucar L. 2013. phiBIOTICS: catalogue of therapeutic enzybiotics,  
468 relevant research studies and practical applications. *BMC Microbiol* 13:53.
- 469 6. Oliveira H, Vilas Boas D, Mesnage S, Kluskens LD, Lavigne R, Sillankorva S, Secundo F,  
470 Azeredo J. 2016. Structural and Enzymatic Characterization of ABgp46, a Novel Phage  
471 Endolysin with Broad Anti-Gram-Negative Bacterial Activity. *Front Microbiol* 7:208.
- 472 7. Elbreki M, Ross RP, Hill C, O'Mahony J, McAuliffe O, Coffey A. 2014. Bacteriophages and  
473 Their Derivatives as Biotherapeutic Agents in Disease Prevention and Treatment. *Journal of*  
474 *Viruses* 2014:20.
- 475 8. Schmelcher M, Powell AM, Becker SC, Camp MJ, Donovan DM. 2012. Chimeric phage  
476 lysins act synergistically with lysostaphin to kill mastitis-causing *Staphylococcus aureus* in  
477 murine mammary glands. *Appl Environ Microbiol* 78:2297-305.
- 478 9. Fenton M, Ross P, McAuliffe O, O'Mahony J, Coffey A. 2010. Recombinant bacteriophage  
479 lysins as antibacterials. *Bioeng Bugs* 1:9-16.
- 480 10. Gu J, Zuo J, Lei L, Zhao H, Sun C, Feng X, Du C, Li X, Yang Y, Han W. 2011. LysGH15  
481 reduces the inflammation caused by lethal methicillin-resistant *Staphylococcus aureus*  
482 infection in mice. *Bioeng Bugs* 2:96-9.
- 483 11. Oechslin F, Daraspe J, Giddey M, Moreillon P, Resch G. 2013. In vitro characterization of  
484 PlySK1249, a novel phage lysin, and assessment of its antibacterial activity in a mouse  
485 model of *Streptococcus agalactiae* bacteremia. *Antimicrob Agents Chemother* 57:6276-83.
- 486 12. Loeffler JM, Djurkovic S, Fischetti VA. 2003. Phage Lytic Enzyme Cpl-1 as a Novel  
487 Antimicrobial for Pneumococcal Bacteremia. *Infection and Immunity* 71:6199-6204.
- 488 13. Lewinsohn DM, Leonard MK, LoBue PA, Cohn DL, Daley CL, Desmond E, Keane J,

- 489 Lewinsohn DA, Loeffler AM, Mazurek GH, O'Brien RJ, Pai M, Richeldi L, Salfinger M,  
490 Shinnick TM, Sterling TR, Warshauer DM, Woods GL. 2017. Official American Thoracic  
491 Society/Infectious Diseases Society of America/Centers for Disease Control and Prevention  
492 Clinical Practice Guidelines: Diagnosis of Tuberculosis in Adults and Children. *Clin Infect*  
493 *Dis* 64:111-115.
- 494 14. Lood R, Raz A, Molina H, Euler CW, Fischetti VA. 2014. A highly active and negatively  
495 charged *Streptococcus pyogenes* lysin with a rare D-alanyl-L-alanine endopeptidase activity  
496 protects mice against streptococcal bacteremia. *Antimicrob Agents Chemother* 58:3073-84.
- 497 15. Gilmer DB, Schmitz JE, Euler CW, Fischetti VA. 2013. Novel bacteriophage lysin with  
498 broad lytic activity protects against mixed infection by *Streptococcus pyogenes* and  
499 methicillin-resistant *Staphylococcus aureus*. *Antimicrob Agents Chemother* 57:2743-50.
- 500 16. Roach DR, Donovan DM. 2015. Antimicrobial bacteriophage-derived proteins and  
501 therapeutic applications. *Bacteriophage* 5:e1062590.
- 502 17. Lai M-J, Lin N-T, Hu A, Soo P-C, Chen L-K, Chen L-H, Chang K-C. 2011. Antibacterial  
503 activity of *Acinetobacter baumannii* phage  $\phi$ AB2 endolysin (LysAB2) against both Gram-  
504 positive and Gram-negative bacteria. *Applied Microbiology and Biotechnology* 90:529-539.
- 505 18. Briers Y, Walmagh M, Grymonprez B, Biebl M, Pirnay JP, Defraigne V, Michiels J, Cenens  
506 W, Aertsen A, Miller S, Lavigne R. 2014. Art-175 is a highly efficient antibacterial against  
507 multidrug-resistant strains and persists of *Pseudomonas aeruginosa*. *Antimicrob Agents*  
508 *Chemother* 58:3774-84.
- 509 19. Briers Y, Walmagh M, Van Puyenbroeck V, Cornelissen A, Cenens W, Aertsen A, Oliveira  
510 H, Azeredo J, Verween G, Pirnay JP, Miller S, Volckaert G, Lavigne R. 2014. Engineered  
511 endolysin-based "Artilynsins" to combat multidrug-resistant gram-negative pathogens. *MBio*  
512 5:e01379-14.
- 513 20. Lood R, Winer BY, Pelzek AJ, Diez-Martinez R, Thandar M, Euler CW, Schuch R,  
514 Fischetti VA. 2015. Novel phage lysin capable of killing the multidrug-resistant gram-  
515 negative bacterium *Acinetobacter baumannii* in a mouse bacteremia model. *Antimicrob*  
516 *Agents Chemother* 59:1983-91.
- 517 21. Briers Y, Walmagh M, Lavigne R. 2011. Use of bacteriophage endolysin EL188 and outer  
518 membrane permeabilizers against *Pseudomonas aeruginosa*. *J Appl Microbiol* 110:778-85.
- 519 22. Thummeepak R, Kittit T, Kunthalert D, Sitthisak S. 2016. Enhanced Antibacterial Activity  
520 of *Acinetobacter baumannii* Bacteriophage  $\phi$ ABP-01 Endolysin (LysABP-01) in  
521 Combination with Colistin. *Front Microbiol* 7:1402.
- 522 23. Ibarra-Sánchez LA, Van Tassell ML, Miller MJ. 2018. Antimicrobial behavior of phage  
523 endolysin PlyP100 and its synergy with nisin to control *Listeria monocytogenes* in Queso



- 524 Fresco. Food Microbiol 72:128-134.
- 525 24. Letrado P, Corsini B, Díez-Martínez R, Bustamante N, Yuste JE, García P. 2018.
- 526 Bactericidal synergism between antibiotics and phage endolysin Cpl-711 to kill multidrug-
- 527 resistant pneumococcus. Future Microbiol 13:1215-1223.
- 528 25. Kim NH, Park WB, Cho JE, Choi YJ, Choi SJ, Jun SY, Kang CK, Song KH, Choe PG,
- 529 Bang JH, Kim ES, Park SW, Kim NJ, Oh MD, Kim HB. 2018. Effects of Phage Endolysin
- 530 SAL200 Combined with Antibiotics on *Staphylococcus aureus* Infection. Antimicrob
- 531 Agents Chemother 62.
- 532 26. López M, Rueda A, Florido JP, Blasco L, Fernández-García L, Trastoy R, Fernández-
- 533 Cuenca F, Martínez-Martínez L, Vila J, Pascual A, Bou G, Tomas M. 2018. Evolution of the
- 534 Quorum network and the mobilome (plasmids and bacteriophages) in clinical strains of
- 535 *Acinetobacter baumannii* during a decade. Sci Rep 8:2523.
- 536 27. López-Causapé C, Sommer LM, Cabot G, Rubio R, Ocampo-Sosa AA, Johansen HK,
- 537 Figuerola J, Cantón R, Kidd TJ, Molin S, Oliver A. 2017. Evolution of the *Pseudomonas*
- 538 *aeruginosa* mutational resistome in an international Cystic Fibrosis clone. Sci Rep 7:5555.
- 539 28. Esteban-Cantos A, Aracil B, Bautista V, Ortega A, Lara N, Saez D, Fernández-Romero S,
- 540 Pérez-Vázquez M, Navarro F, Grundmann H, Campos J, Oteo J, Network E-S. 2017. The
- 541 Carbapenemase-Producing *Klebsiella pneumoniae* Population Is Distinct and More Clonal
- 542 than the Carbapenem-Susceptible Population. Antimicrob Agents Chemother 61.
- 543 29. Schmitz JE, Schuch R, Fischetti VA. 2010. Identifying active phage lysins through
- 544 functional viral metagenomics. Appl Environ Microbiol 76:7181-7.
- 545 30. Sopirala MM, Mangino JE, Gebreyes WA, Biller B, Bannerman T, Balada-Llasat JM,
- 546 Pancholi P. 2010. Synergy testing by Etest, microdilution checkerboard, and time-kill
- 547 methods for pan-drug-resistant *Acinetobacter baumannii*. Antimicrob Agents Chemother
- 548 54:4678-83.
- 549 31. Peleg AY, Jara S, Monga D, Eliopoulos GM, Moellering RC, Mylonakis E. 2009. *Galleria*
- 550 *mellonella* as a model system to study *Acinetobacter baumannii* pathogenesis and
- 551 therapeutics. Antimicrob Agents Chemother 53:2605-9.
- 552 32. Yang H, Chen G, Hu L, Liu Y, Cheng J, Li H, Ye Y, Li J. 2015. In vivo activity of
- 553 daptomycin/colistin combination therapy in a *Galleria mellonella* model of *Acinetobacter*
- 554 *baumannii* infection. Int J Antimicrob Agents 45:188-91.
- 555 33. U.S. Office of the Press Secretary: Washington D, USA,. 2015. The White House.
- 556 National Action Plan for Combating Antibiotic-Resistant Bacteria. Interagency Task Force
- 557 for Combating Antibiotic-Resistant Bacteria ;.
- 558 34. Love MJ, Bhandari D, Dobson RCJ, Billington C. 2018. Potential for Bacteriophage



- 559 Endolysins to Supplement or Replace Antibiotics in Food Production and Clinical Care.  
560 Antibiotics (Basel) 7.
- 561 35. Nguyen S, Baker K, Padman BS, Patwa R, Dunstan RA, Weston TA, Schlosser K, Bailey B,  
562 Lithgow T, Lazarou M, Luque A, Rohwer F, Blumberg RS, Barr JJ. 2017. Bacteriophage  
563 Transcytosis Provides a Mechanism To Cross Epithelial Cell Layers. MBio 8.
- 564 36. Mao J, Schmelcher M, Harty WJ, Foster-Frey J, Donovan DM. 2013. Chimeric Ply187  
565 endolysin kills *Staphylococcus aureus* more effectively than the parental enzyme. FEMS  
566 Microbiol Lett 342:30-6.
- 567 37. Mayer MJ, Garefalaki V, Spoerl R, Narbad A, Meijers R. 2011. Structure-based  
568 modification of a *Clostridium difficile*-targeting endolysin affects activity and host range. J  
569 Bacteriol 193:5477-86.
- 570 38. Kosikowska P, Lesner A. 2016. Antimicrobial peptides (AMPs) as drug candidates: a patent  
571 review (2003-2015). Expert Opin Ther Pat 26:689-702.
- 572 39. Da Silva GJ, Domingues S. 2017. Interplay between Colistin Resistance, Virulence and  
573 Fitness in *Acinetobacter baumannii*. Antibiotics (Basel) 6.
- 574 40. López M, Rueda A, Florido JP, Blasco L, Gato E, Fernández-García L, Martínez-Martínez L,  
575 Fernández-Cuenca F, Pachón J, Cisneros JM, Garnacho-Montero J, Vila J, Rodríguez-Baño  
576 J, Pascual A, Bou G, Tomás M. 2016. Genomic Evolution of Two *Acinetobacter baumannii*  
577 Clinical Strains from ST-2 Clones Isolated in 2000 and 2010 (ST-2\_clon\_2000 and ST-  
578 2\_clon\_2010). Genome Announc 4.
- 579 41. Veiga-Crespo P, Ageitos JM, Poza M, Villa TG. 2007. Enzybiotics: a look to the future,  
580 recalling the past. J Pharm Sci 96:1917-24.
- 581 42. Yang H, Yu J, Wei H. 2014. Engineered bacteriophage lysins as novel anti-infectives. Front  
582 Microbiol 5:542.
- 583 43. Jarábková V, Tišáková L, Godány A. 2015. Phage Endolysin: A Way To Understand A  
584 Binding Function Of C-Terminal Domains A Mini Review. 14:117.
- 585 44. Oliveira H, Melo LD, Santos SB, Nóbrega FL, Ferreira EC, Cerca N, Azeredo J, Kluskens  
586 LD. 2013. Molecular aspects and comparative genomics of bacteriophage endolysins. J  
587 Virol 87:4558-70.
- 588 45. Deris ZZ, Akter J, Sivanesan S, Roberts KD, Thompson PE, Nation RL, Li J, Velkov T.  
589 2014. A secondary mode of action of polymyxins against Gram-negative bacteria involves  
590 the inhibition of NADH-quinone oxidoreductase activity. J Antibiot (Tokyo) 67:147-51.
- 591 46. Cheah SE, Johnson MD, Zhu Y, Tsuji BT, Forrest A, Bulitta JB, Boyce JD, Nation RL, Li J.  
592 2016. Polymyxin Resistance in *Acinetobacter baumannii*: Genetic Mutations and  
593 Transcriptomic Changes in Response to Clinically Relevant Dosage Regimens. Sci Rep

- 594 6:26233.
- 595 47. Ni W, Li Y, Guan J, Zhao J, Cui J, Wang R, Liu Y. 2016. Effects of Efflux Pump Inhibitors  
596 on Colistin Resistance in Multidrug-Resistant Gram-Negative Bacteria. *Antimicrob Agents*  
597 *Chemother* 60:3215-8.
- 598 48. Lin MF, Lin YY, Lan CY. 2017. Contribution of EmrAB efflux pumps to colistin resistance  
599 in *Acinetobacter baumannii*. *J Microbiol* 55:130-136.
- 600 49. Verma P, Maurya P, Tiwari M, Tiwari V. 2017. In-silico interaction studies suggest RND  
601 efflux pump mediates polymyxin resistance in *Acinetobacter baumannii*. *J Biomol Struct*  
602 *Dyn*:1-9.
- 603 50. Poirel L, Jayol A, Nordmann P. 2017. Polymyxins: Antibacterial Activity, Susceptibility  
604 Testing, and Resistance Mechanisms Encoded by Plasmids or Chromosomes. *Clin*  
605 *Microbiol Rev* 30:557-596.
- 606 51. Machado D, Antunes J, Simões A, Perdigão J, Couto I, McCusker M, Martins M, Portugal I,  
607 Pacheco T, Batista J, Toscano C, Viveiros M. 2018. Contribution of efflux to colistin  
608 heteroresistance in a multidrug resistant *Acinetobacter baumannii* clinical isolate. *J Med*  
609 *Microbiol* 67:740-749.

610

611

612 **FIGURES AND TABLES**

613 **Table 1.** Description of the bacterial strains, plasmids and primers used in this study.

614 **Figure 1.** Genome of the bacteriophages Ab105Φ1 (GenBank: KT588074.1) and  
615 Ab105Φ2 (GenBank: KT588075.2) by figure modified from PHAST software. .SDS-  
616 PAGE purification of the endolysins ElyA1 and ElyA2 (chromatography study).

617 **Figure 2.** Characterization of enzymatic activity: a) Muralytic activity of ElyA1 was  
618 done by spots of ElyA1 and endolysin buffer as negative control in a Gram-negative  
619 overlay of two *Acinetobacter baumannii* clinical isolates, MAR001 and PAU002; b) pH  
620 range and c) Temperature range, were determined by the specific activity measured as  
621 the difference in optical density of the culture per µg of enzyme and minute.

622 **Figure 3.** Specific activity of endolysin ElyA1 tested in clinical isolates from different  
623 multilocus sequence types (STs) of three Gram-negative members of the ESKAPE  
624 group: *Acinetobacter. baumannii*, *Pseudomonas aeruginosa* and *Klebsiella*  
625 *pneumoniae*.

626 **Figure 4.** Bactericidal activity of colistin in combination with endolysin ElyA1  
627 measured by MIC and time kill curves in *Acinetobacter baumannii* strains GMA001 (a)  
628 and PON001 (b); *Pseudomonas aeruginosa* strains AUS531(c) and AUS601(d);  
629 *Klebsiella pneumoniae* strains KP17(e) and KP16 (f). The time kill curves were only  
630 constructed for strains in which there was a fourfold reduction in colistin MICs (red  
631 square) when used in combination with the endolysin ElyA1(yellowsquare).

632 **Figure 5.** Survival curves of *G. mellonella* larvae infected with *A. baumannii* clinical  
633 strain PON001. a) Treated with colistin (1/4 MIC) and with colistin (1/4 MIC)  
634 combined with endolysin ElyA1 (25µg/ml); b) Treated with colistin (1/4 MIC) and with  
635 colistin (1/4 MIC) combined with endolysin ElyA2 (25µg/ml). This experiment was  
636 carried out with an adequate survival control.

| Strain, Plasmid,<br>Primer<br>Strain   | Description, Characteristics and Sequence                                                                                                                           | Origin and Reference |
|----------------------------------------|---------------------------------------------------------------------------------------------------------------------------------------------------------------------|----------------------|
| <b>Strains</b>                         |                                                                                                                                                                     |                      |
| <i>Acinetobacter baumannii</i>         | 25 clinical isolates (22 STs) from the II Spanish Multicentre Study (GEIH-REIPI <i>Acinetobacter baumannii</i> 2000-2010)<br>(Accession number Genbank PRJNA422585) | 27                   |
| <i>Pseudomonas aeruginosa</i>          | 25 clinical isolates (ST274 [n = 15]; ST1089 [n = 3]; ST not known [n = 7])                                                                                         | 28                   |
| <i>Klebsiella pneumoniae</i>           | 17 clinical isolates belonging to 16 different STs                                                                                                                  | 29                   |
| <i>Escherichia coli</i> DH5 $\alpha$   | Strain using for cloning                                                                                                                                            | Novagen              |
| <i>Escherichia coli</i> Rosetta pLys-S | Strain for protein expression                                                                                                                                       | Novagen              |
| <b>Plasmid</b>                         |                                                                                                                                                                     |                      |
| pET-28a                                | Km <sup>r</sup> , T7lac, His-Tag, T7-Tag, thrombine protease site                                                                                                   | Novagen              |
| <b>Primers</b>                         |                                                                                                                                                                     |                      |
| Forward                                | 5'-AGTTCTGTTCCAGGGGCCCATATGAA<br>CATTGAACAATATCTTGATGAA-3'                                                                                                          | This study           |
| Reverse                                | 5'-AGTGGTGGTGGTGGTGGTGGTCTCGAGT<br>CACATTGATACTCGATTAGCAAT-3'                                                                                                       | This study           |

638

639 *Abbreviations:* ST; multilocus sequence type640 **Table 1.**

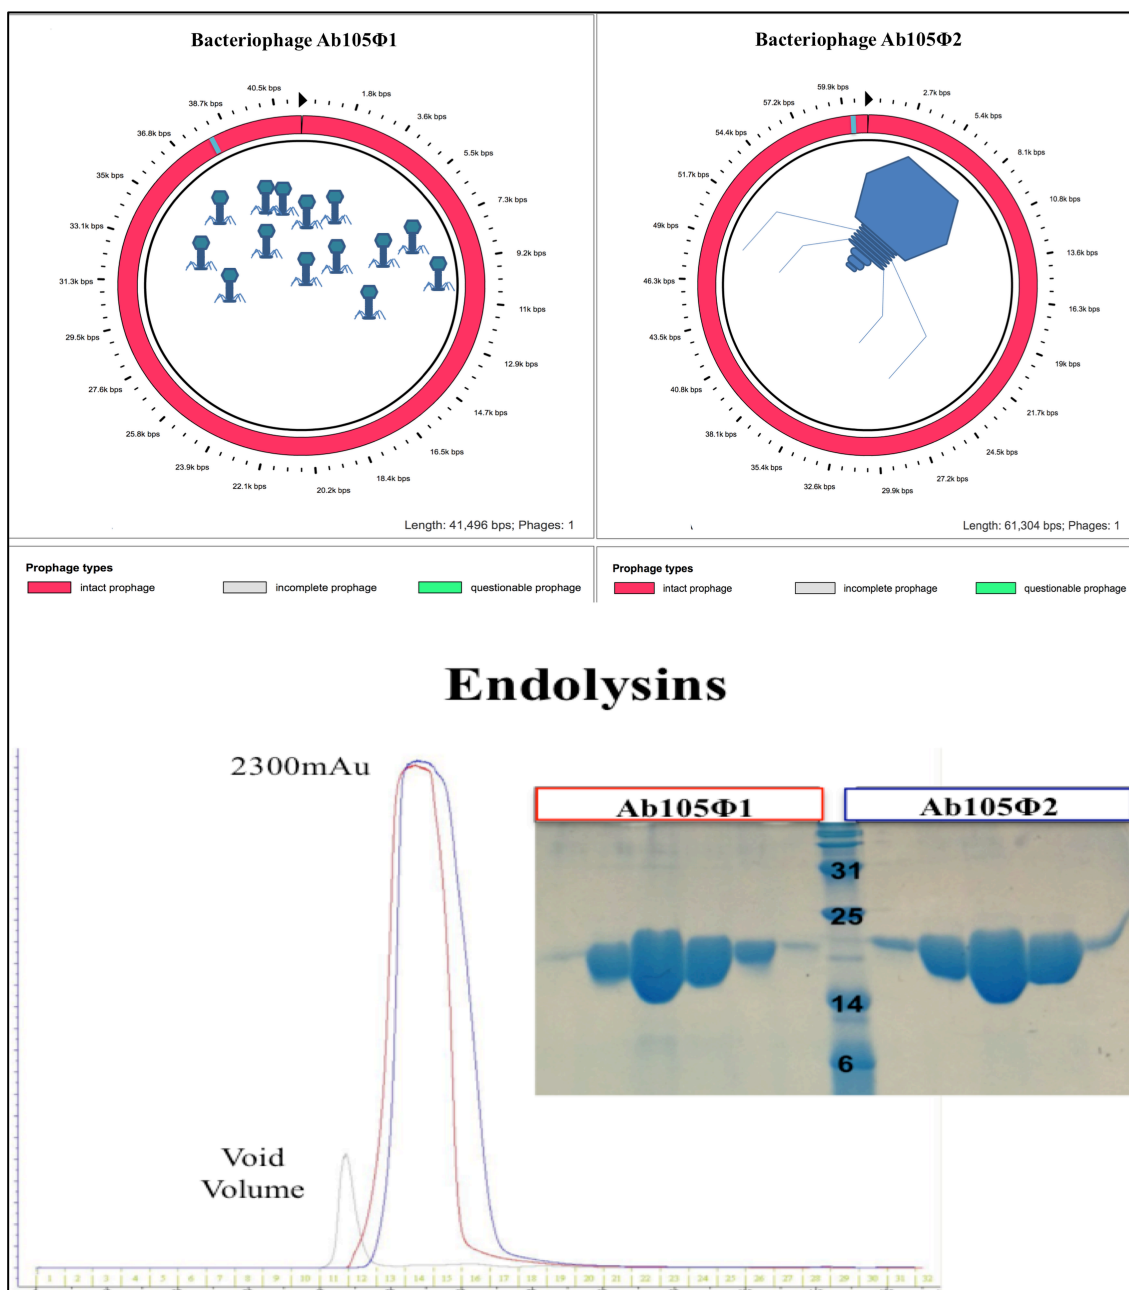

641

642 **Figure 1.**

643

644

645

646

647

648

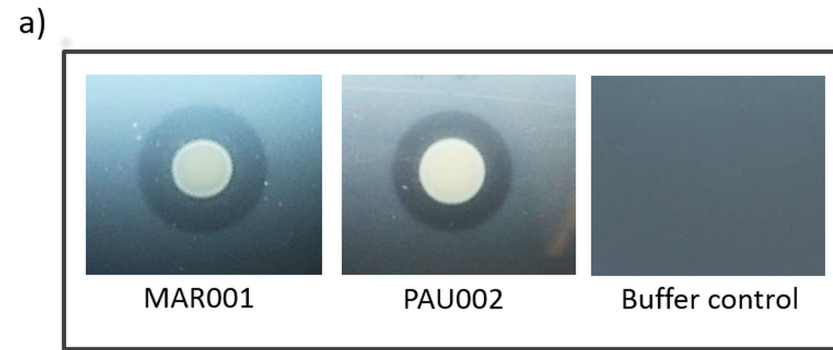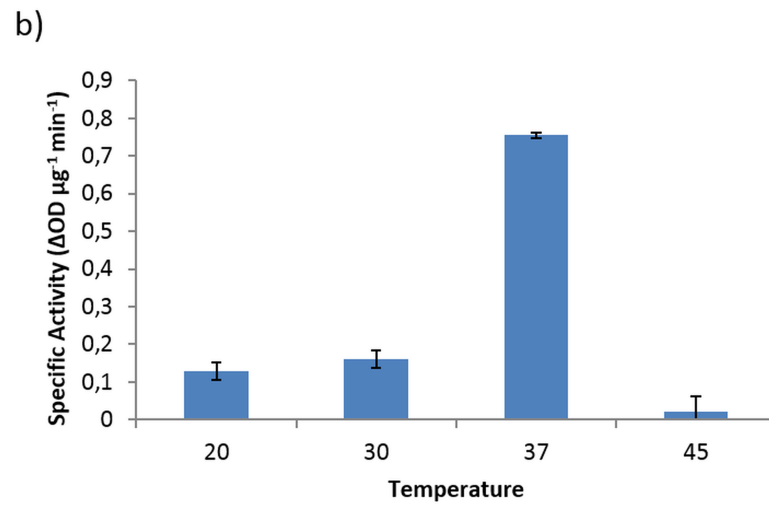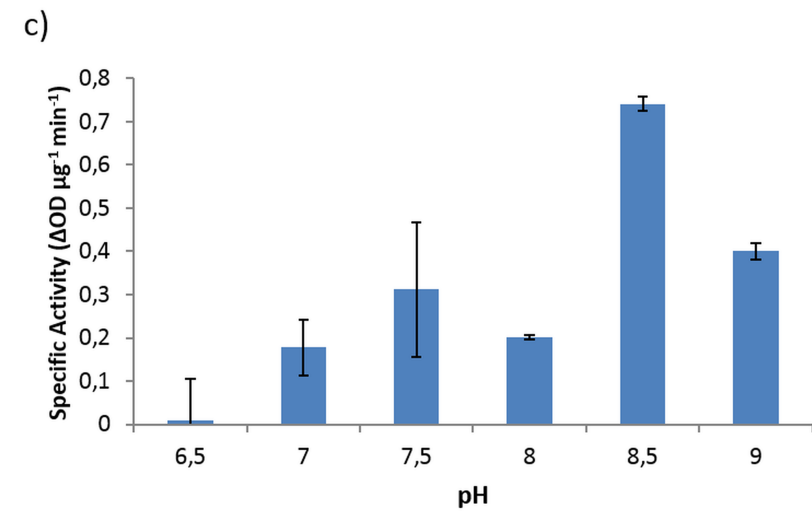

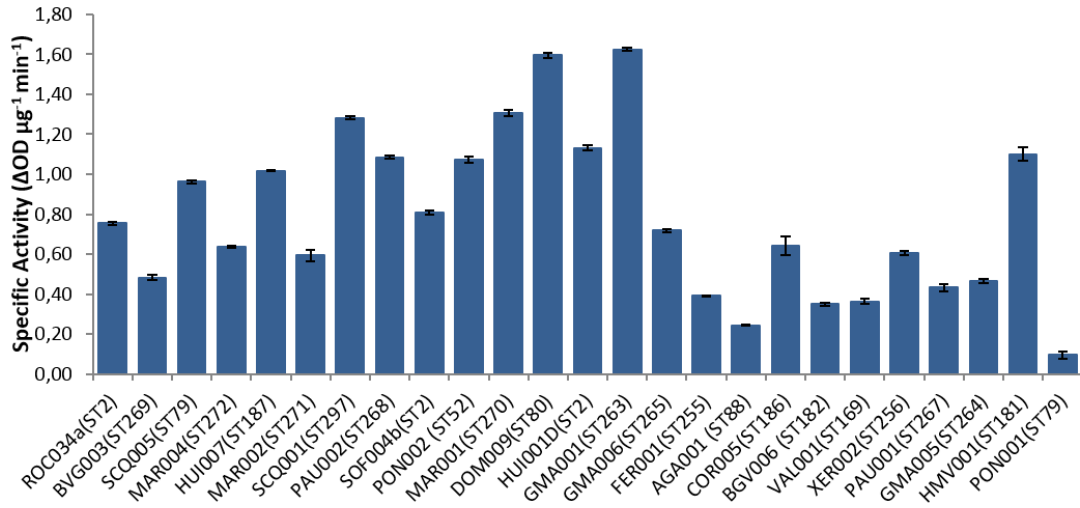

***A. baumannii***

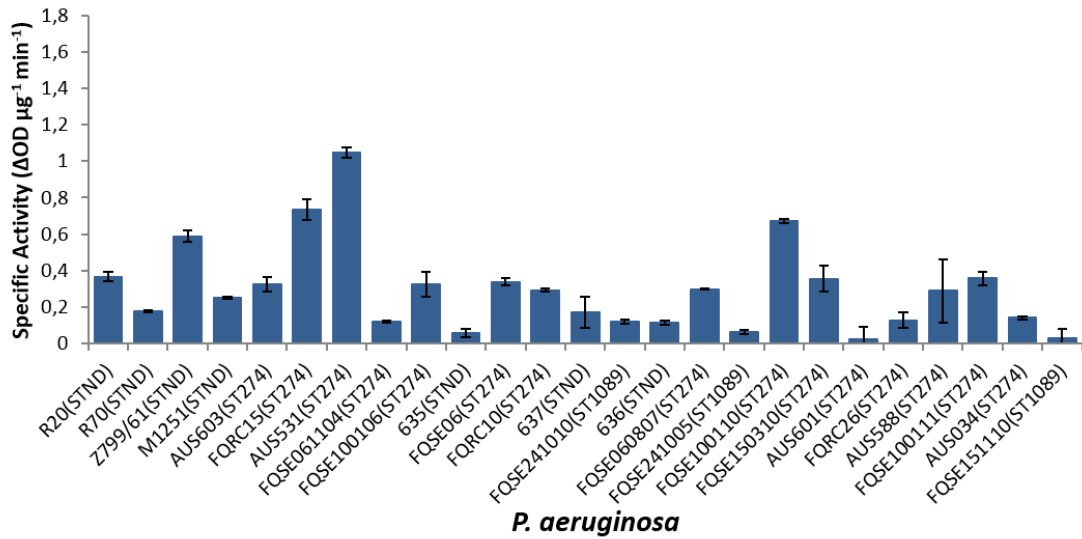

***P. aeruginosa***

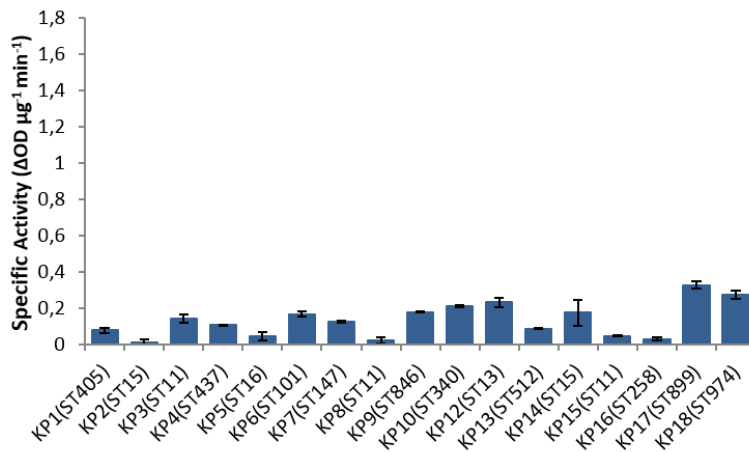

***K. pneumoniae***

652

653 **Figure 3.**

654

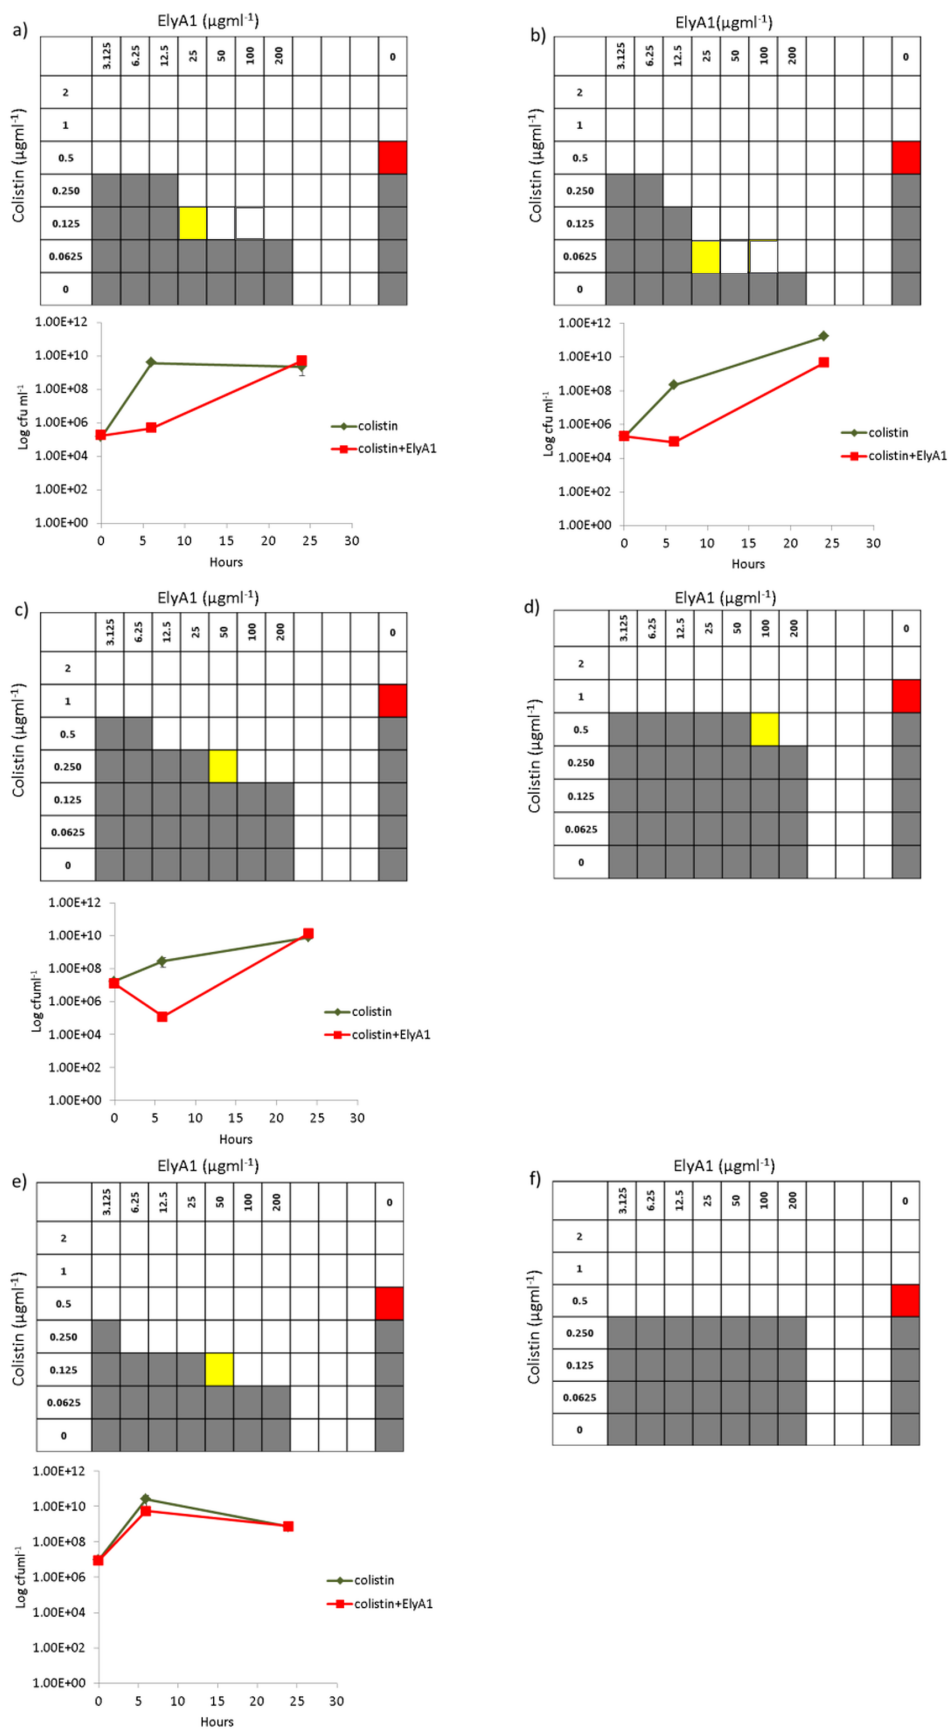

655

656

Figure 4.



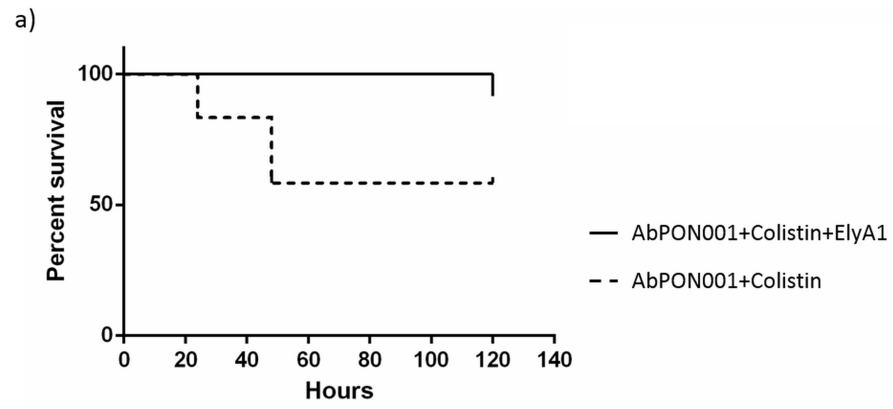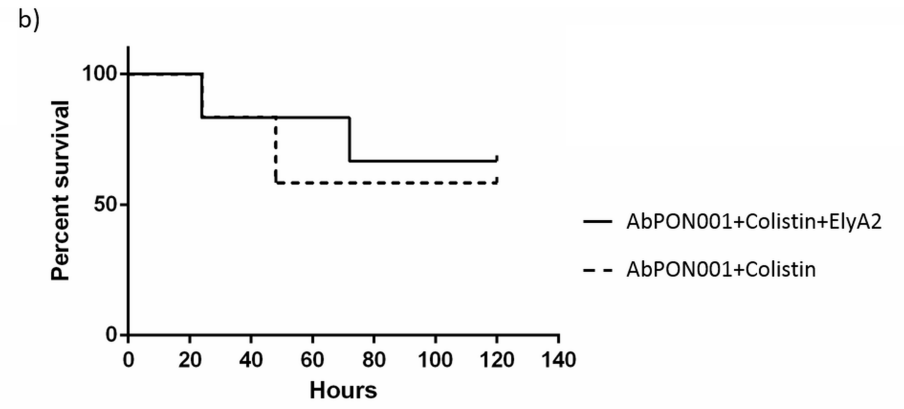

657

658

**Figure 5.**
